1 Disentangling bacterial invasiveness from  
2 lethality in an experimental host-pathogen  
3 system

4  
5 Tommaso Biancalani<sup>1</sup> and Jeff Gore<sup>1+</sup>

6 <sup>1</sup> Physics of Living Systems, Department of Physics, Massachusetts Institute of Technology, Cambridge, MA, 02139, USA

7 <sup>+</sup>Corresponding author: [gore@mit.edu](mailto:gore@mit.edu)

## 8 ABSTRACT

9 Quantifying virulence remains a central problem in human health, pest control, disease ecology,  
10 and evolutionary biology. Bacterial virulence is typically quantified by the *LT50* (*i.e.* the time  
11 taken to kill 50% of infected hosts), however, such an indicator cannot account for the full  
12 complexity of the infection process, such as distinguishing between the pathogen's ability to  
13 colonize vs. kill the hosts. Indeed, the pathogen needs to breach the primary defenses in order to  
14 colonize, find a suitable environment to replicate, and finally express the virulence factors that  
15 cause disease. Here, we show that two virulence attributes, namely pathogen lethality and  
16 invasiveness, can be disentangled from the survival curves of a laboratory population of  
17 *Caenorhabditis elegans* nematodes exposed to three bacterial pathogens: *Pseudomonas*  
18 *aeruginosa*, *Serratia marcescens* and *Salmonella enterica*. We first show that the host population  
19 eventually experiences a constant mortality rate, which quantifies the lethality of the pathogen.  
20 We then show that the time necessary to reach this constant-mortality rate regime depends on the  
21 pathogen growth rate and colonization rate, and thus determines the pathogen invasiveness. Our  
22 framework reveals that *Serratia marcescens* is particularly good at the initial colonization of the  
23 host, whereas *Salmonella enterica* is a poor colonizer yet just as lethal once established.  
24 *Pseudomonas aeruginosa*, on the other hand, is both a good colonizer and highly lethal after  
25 becoming established. The ability to quantitatively characterize the ability of different pathogens  
26 to perform each of these steps has implications for treatment and prevention of disease and for  
27 the evolution and ecology of pathogens.

28

## 29 I - INTRODUCTION

30 Quantifying virulence is challenging because the mortality induced by a pathogen is determined  
31 by a complex series of interactions between the pathogen and the host. The virulence of a  
32 pathogen will depend upon the level of *invasiveness*, governed by the pathogen's ability to  
33 colonize and grow within the host, as well as the level of *lethality*, governed by the mortality that  
34 is induced following colonization due to factors such as toxicity [1]. Moreover, both the  
35 invasiveness and lethality of a pathogen will depend upon host characteristics such as age,  
36 immune system, and microbiome [2].

37

38 Despite these results, there is still no consensus on how to disentangle the various pathogen  
39 attributes from the survival curves of a host-pathogen system. In the majority of experimental  
40 studies, survival curves are merely boiled down to the phenomenological indicator *LT50*, which  
41 denotes the median lethal time (*e.g.* in pest control [3] and toxicology [4]). The usage of *LT50* is  
42 often justified on grounds of simplicity, despite the fact that this indicator suffers from being  
43 highly sensitive to experimental conditions (as shown later). Most importantly, *LT50* does not  
44 describe a specific characteristic of the pathogen but rather provides a rough account of all  
45 factors that cause virulence. Hence, it is not possible to use *LT50* to disentangle whether the  
46 hosts are dying because of a highly invasive pathogen or a highly lethal one. The question can  
47 also be posed conversely: what pathogen attributes need to be known to fully determine the  
48 survival curves of the hosts?

49

50 Here, we use an experimentally tractable host-pathogen model system to disentangle how  
51 pathogen invasiveness and lethality lead to pathogen virulence. We study the dynamics of a  
52 laboratory population of hosts (the nematode *C. elegans*) exposed to three bacterial human  
53 pathogens that also cause mortality in *C. elegans*: *P. aeruginosa*, *S. marcescens* and *S. enterica*.

54 This experimental system, especially with the pathogen *P. aeruginosa*, has been used to  
55 investigate molecular mechanisms of virulence [5] [6], animal immunity [7], and mechanisms for  
56 pathogen aversion [8]. Quantitative analysis of survival curves of worms exposed to all three  
57 pathogens revealed that the worms eventually experienced a pathogen-specific per-capita  
58 mortality rate. This pathogen-specific mortality rate was independent of pathogen exposure,  
59 indicating that it reflects the intrinsic lethality of the pathogen against this host. A theoretical  
60 model incorporating host colonization and pathogen growth predicts that the constant host  
61 mortality rate emerges from pathogen load saturating within the host, and this prediction is  
62 confirmed experimentally. The time necessary to reach this exponential phase where the host  
63 experiences a constant-mortality rate reflects the pathogen invasiveness, due to the pathogen  
64 colonization rate and growth rate within the host. Our integrated experiments and modeling  
65 approach therefore allows us to disentangle the invasiveness from the lethality and to see how  
66 each quantitatively depends upon the pathogen colonization rate, the growth rate within the host,  
67 and the pathogen lethality.

## 68 II - RESULTS

69

### 70 II-A Experiments show that survival curves display an exponential phase

71

72 Our initial aim was to analyze how the *C. elegans* host survival curves are affected by exposing  
73 the hosts to the same pathogen at different pathogen densities. On agar plates with rich media,  
74 we spread a lawn of *P. aeruginosa* and incubated for either 4 hr (low), 24 hr (mid), or 48 hr  
75 (high), so that the pathogen density can reach different densities (*e.g.* high = high pathogen  
76 density). On each agar plate, we then added a population of approximately fifty *C. elegans* adult  
77 nematodes, which are same-age, reproductive sterile and initially germ-free. The nematodes feed  
78 on the pathogens, which colonize the worm gut and disrupt the epithelium provoking the death of  
79 the host. Using standard worm picking protocols we monitor the fraction of worms surviving  
80 over time [9] (see *Materials and Methods*).

81

82 As expected from previous experimental results [10], the worms die due to bacterial infection  
83 over the course of a few days, whereas in the absence of the pathogen the worms would live for a  
84 few weeks. Consistent with the expectation that higher bacterial densities will be more virulent,  
85 we find that the lethal time for 50% of worms to die (*LT50*) is approximately 95 hr for worms  
86 fed at low bacterial density (that is, pre-incubated for 4 hr) and 55 hr for worms fed at high  
87 bacterial density (pre-incubated for 48 hr) (**Fig. 1-A**). The measured *LT50* therefore depends not  
88 only on the particular pathogen and host being studied, but also on the details of the experimental  
89 protocol, in this case the pre-incubation time of the pathogen.

90

91 It would be ideal if there were some feature in the survival curves that was independent of the  
92 pathogen lawn density, as this would indicate an attribute that was intrinsic to the pathogen and  
93 its host. Encouragingly, the survival curves plotted on a semi-log scale show a linear regime,  
94 indicating that over longer times the worms are dying at a constant (per capita) rate (**Fig. 1-A**). In  
95 this regime, the fraction of worms surviving decays exponentially, thus we refer to this regime as  
96 the exponential phase. The slopes of the survival curve lines,  $\delta_s$ , correspond to host mortality  
97 rates. Unlike *LT50*s, we find that the slopes are the same for the different initial pathogen

98 densities, leading to mortality rates of  $\delta \sim 0.055 \text{ hr}^{-1}$  (70% of the host population dies every  
99 day). Our experimental observation that the mortality rate in the exponential phase is  
100 independent of pathogen densities suggests that the mortality rate is a reflection of the intrinsic  
101 lethality of the pathogen.

102  
103 We next tested whether pathogen-induced mortality with (eventual) constant rate occurs  
104 ubiquitously across pathogens. We repeated the experiment under identical conditions but using  
105 pathogens *P. aeruginosa* (*Pa*), *S. marcescens* (*Sm*), and *S. enterica* (*Se*) (**Fig. 1-B**). All survival  
106 curves exhibited an exponential phase, although the slopes of the lines are different for the three  
107 pathogens. In *Pa*, we confirm the result found in the previous experiment, whereas in *Sm* and *Se*  
108 we find  $\delta_{Sm} \sim 0.02 \text{ hr}^{-1}$  (~40% population death rate per day) and  $\delta_{Se} \sim 0.03 \text{ hr}^{-1}$  (~50%). We  
109 also confirmed that the lethalties  $\delta_{Sm}$  and  $\delta_{Se}$  are independent of the lawn pathogen density  
110 (**Fig. S1**), as we already showed for  $\delta_{Pa}$ . These results indicate that exponential death occurs in  
111 our experimental system for many different pathogens, and that the lethality  $\delta$  is a characteristic  
112 indicator of the host-pathogen interaction.

113  
114 We note that ranking the pathogens by their lethalties is not consistent with the ranking obtained  
115 by their *LT50*s (**Fig. 1-B inset**). In fact,  $LT50_{Sm} \sim 70 \text{ hr}$  and  $LT50_{Se} \sim 120 \text{ hr}$ , which suggests  
116 that *Sm* is more virulent than *Se* whereas the slopes  $\delta_{Sm}$  and  $\delta_{Se}$  indicate the converse. This  
117 discrepancy arises because to fully understand survival curves, we also need to consider the time  
118 taken to enter the exponential phase (henceforth denoted by  $\tau$ ), in addition to the lethality  $\delta$ .  
119 Indeed, *LT50* is strongly correlated to the time  $\tau$ , whereas the lethality  $\delta$  is not (**Fig. 1-C**). In *Se*,  
120 the time required to enter exponential phase is twice the time in *Sm* ( $\tau_{Se} \sim 102 \text{ hr}$  and  
121  $\tau_{Sm} \sim 50 \text{ hr}$ ), although the exponential phase in *Se* is characterized by a sharper decline ( $\delta_{Se} >$   
122  $\delta_{Sm}$ ). This signifies that *Sm* kills the hosts with a higher rate than *Se* at the early stages of the  
123 infection but is then surpassed by *Se* as the infection progresses. Therefore, the indicator pair  
124  $(\tau, \delta)$  provides a more comprehensive description of the host survival curves than *LT50*.

125

## 126 II-B Theoretical model disentangles pathogen invasiveness and lethality from the survival 127 curve of host population

128

129 To explain the previous results, we use a simple population dynamics model that incorporates a  
130 pathogen colonization rate  $c$ , pathogen growth rate  $r$ , and saturating population size  $K$  within the  
131 host. We assume that the pathogen population size within a worm, denoted by  $N$ , follows

132

$$133 \quad (1) \quad \frac{dN}{dt} = (rN + c) \left(1 - \frac{N}{K}\right).$$

134

135 This simple model ensures that the pathogen population saturates at carrying capacity  $K$  (as  
136 compared to the similar choice for the right-hand side of equation (1)  $rN(1 - N/K) + c$ , but this  
137 choice does not lead to any significant difference in our conclusions). We also make the simplest  
138 assumption for host mortality, namely that host mortality is linearly proportional to the pathogen  
139 load. In this case the fraction of worms surviving  $w(t)$  will change according to:

140

$$141 \quad (2) \quad \frac{dw}{dt} = -\delta w \frac{N}{K}$$

142 where the constant  $\delta$  is the lethality of the pathogen at saturation. Although models of wild  
143 disease are complex [11], we find that this exceedingly simple model suffices in our setting. In  
144 fact, our model predicts that the survival curves enter an exponential phase as the pathogen load  
145 reaches carrying capacity  $K$  (**Fig. 2**). When  $N(t) = K$ , equation (1) reduces to  $\dot{w} = -\delta w$ ,  
146 indicating that the per capita death rate,  $\dot{w}/w$ , is given by the constant  $\delta$ . Moreover, equations  
147 (1) and (2) with our initial conditions can be exactly solved, and yield predictions for the survival  
148 curve  $w$  and the pathogen load  $N$  in terms of the pathogen colonization rate, growth rate and  
149 lethality (see *Supplementary Material: Theoretical Model*).

150  
151 We next analyzed the host survival curve and extract the time taken to enter the exponential  
152 phase,  $\tau$ , which we refer to as the invasion time. This time can be formally defined as the  
153 abscissa of the intersection point between the lines  $w = 1$  and the asymptote of the exponential  
154 phase (see Fig. 2). The invasion time can be written as:

$$156 \quad (3) \quad \tau = \frac{1}{r} \log \left( 1 + K \frac{r}{c} \right).$$

157  
158 We note that the invasion time  $\tau$  does not depend on the lethality  $\delta$ , but rather provides a  
159 mechanistic summary of the pathogen's ability to invade the host, which is a combination of the  
160 ability to colonize and grow within the host. Indeed, a prediction of our model is that the time  
161 that it takes for the host mortality curves to reach the exponential phase (invasion time)  
162 corresponds also to the time that it takes the pathogen population to reach saturation within the  
163 host, which we will refer to as the saturation time. The quantity  $\tau^{-1}$  therefore measures the  
164 pathogen invasiveness.

### 166 II-C Survival curves enter exponential phase as the pathogen load is at carrying capacity

167  
168 Next, we tested the model prediction that the time taken to enter the exponential phase  
169 corresponds to the pathogen load growing to carrying capacity in the host population. The model  
170 also provides expressions for the survival curve and the pathogen load curves in terms of the  
171 pathogen colonization rate  $c$ , the growth rate  $r$  and the lethality  $\delta$  (see *Supplementary Material:*  
172 *Theoretical Model*). Fitting the theoretical predictions to experimental data would indicate that  
173 these three parameters determine the host-pathogen dynamics.

174  
175 Our initial objective was to measure the pathogen load at a certain point in time. To do so, we  
176 collected approximately 10 worms, washed their cuticles to remove the external bacteria,  
177 grounded the sample population using a motorized pestle, and finally estimated the content of  
178 their intestines by colony counting (**Fig. 3-A**). Following this protocol, we measured the in-host  
179 growth curves for the three pathogens, the survival curves of which we already showed in Fig. 1-  
180 B (**Fig. 3-B**). After exposing the hosts for a day to a fully-grown lawn, we measure significantly  
181 different number of cells:  $N_{Se}(24 \text{ hr}) \sim 5 \cdot 10^3$  cells,  $N_{Sm}(24 \text{ hr}) \sim 10^4$  cells and  
182  $N_{Pa}(24 \text{ hr}) \sim 2 \cdot 10^4$  cells. This variation at early times reflects the varied colonization abilities  
183 of the pathogens, such as their survival rates as they pass through the grinder, the *C. elegans*  
184 tooth-like structure that crushes most bacteria prior to digestion [12]. After a few days, all  
185 pathogen loads saturated to carrying capacity which differ up to an order of magnitude:  
186  $K_{Se} \sim 1.7 \cdot 10^6$  cells,  $K_{Sm} \sim 1.1 \cdot 10^5$  cells and  $K_{Pa} \sim 2.8 \cdot 10^5$  cells. We note that *Se* is the

187 slowest colonizer but reaches the largest carrying capacity. In general, we found that the three  
188 pathogens exhibit different colonization abilities and carrying capacities within the hosts.

189  
190 We then normalized the pathogen load curves by their carrying capacities to visualize these  
191 curves against the survival curves. In this way, we could test whether the entrance in the  
192 exponential phase occurs as the pathogen load curve plateaus (**Fig. 3-C**). We confirm that this is  
193 the case for the three pathogens: the times taken to enter exponential phase  $\tau$ , were markedly  
194 distinct in the three cases (from 50 hr to 110 hr), yet the invasion times are approximately equal  
195 to the saturation times, as predicted by our model (**Fig. 3-D**). Indeed, we observed that the  
196 pathogen load curves neatly plateaued as the survival curves reached the regime of constant  
197 death rate (**Fig. 3-C**). We tested if our model quantitatively fit the pathogen load and survival  
198 curve. We already measured the death rate  $\delta$  and carrying capacity  $K$  for the three pathogens,  
199 and we determined the colonization rates  $c$  and the growth rates  $r$  by inspection. We found  
200 similar values for the growth rates of the three species ( $r \sim 0.08 \text{ hr}^{-1}$ ), whereas the colonization  
201 abilities of *Pa* and *Sm* ( $\sim 250 \text{ cells / hr}$ ) are better than *Se* ( $\sim 40 \text{ cells / hr}$ ). The agreement  
202 between theory and data indicates that pathogen-induced mortality increases approximately  
203 linearly with pathogen load. We note that this did not have to be the case, as the pathogens could  
204 express virulence factors at any time during the infection process.

205

#### 206 II-D Invasion time $\tau$ can be separated into colonization and replication time intervals

207

208 Next, we use our model and experiments to show that the invasion time  $\tau$  can be split between a  
209 time period that is colonization dominated and a time period that is replication dominated:  $\tau =$   
210  $\tau_c + \tau_r$  (**Fig. 4-A**). In the first-time interval,  $\tau_c$ , the pathogen influx is mostly due to external  
211 colonization rather than replication, since the hosts are initially sterile; in the second interval  $\tau_r$ ,  
212 colonization becomes negligible and the internal pathogen growth is the dominant effect. From  
213 our model, equation [2], we can show that (see *Supplementary Material: Theoretical Model*).

214

$$215 \quad (4) \quad \tau_c = \frac{1}{r} \log(2),$$

216

217 which, interestingly, shows that the time interval in which colonization dominates corresponds to  
218 the pathogen doubling time and is therefore independent of the colonization rate (although we  
219 have assumed  $r \gg c$  in the derivation of equations (3) and (4), which is always the biological  
220 case). During time  $\tau_c$ , the pathogen abundance grows until it reaches  $N^* = c/r$ , after which  
221 replication becomes dominant. The invasion time  $\tau$  can be rewritten as  $\tau = \tau_c + \tau_r =$   
222  $r^{-1} \log(1 + K/N^*)$  which also shows that  $\tau_r$  depends on  $N^*$ . Therefore, the time in which  
223 colonization dominates is largely independent of the lawn pathogen density (which, in our  
224 experiment, determines the colonization rate  $c$ ).

225

226 From our data, we can estimate the colonization time scale  $\tau_c$ , the replication time scale  $\tau_r$  and  
227 the killing time scale  $\delta^{-1}$ , for the three pathogens (**Fig. 4-B**). Since the pathogens have similar  
228 growth rates, the colonization time intervals  $\tau_c$  are approximately equal. In contrast,  $\tau_r$  (and  
229 hence  $\tau$ ) is much larger in *Se* compared to those of *Pa* and *Sm*, due to the difference in carrying  
230 capacity. The killing time scale of *Se* ( $\delta^{-1}$ ) is greater than the killing time scale of *Sm* which,  
231 again, is due to the difference in carrying capacity (in fact, *Sm* has a greater lethality per cell). It

232 is also worth noting that the  $LT50$ s for these three pathogens falls in the killing time interval  
233 (which following the invasion phase), meaning that more than 50% of the hosts die in the  
234 exponential phase.

235  
236 Finally, we inquired whether our model retains its predictive power when the colonization rates  
237 are varied experimentally. We analyzed the *Pa* pathogen load curves obtained for different  
238 pathogen incubation times (Fig. 1-A) and found that, as expected, only the colonization rate  $c$   
239 needs to be varied to fit the three curves (**Fig. 4-C**). These results illustrate how the dynamics of  
240 pathogen colonization and growth are determined by the underlying processes by which the  
241 pathogen invades the host.

### 242 III – DISCUSSION

243  
244 In this study we have demonstrated that integrating quantitative analysis of survival curves with  
245 mathematical modeling allows one to determine how the dynamics governing pathogen invasion  
246 of the host lead to the different timescales associated with host mortality. In particular, we find  
247 that the pathogen invasion time  $\tau$  and lethality  $\delta$  provide a better assessment of virulence than  
248 using  $LT50$ . Extracting  $\tau$  and  $\delta$  from the survival curves allow us to disentangle whether the  
249 salient pathogen characteristic is to be a good invader or a good killer, which is not possible to  
250 determine just by using  $LT50$ . These indicators also inform us about the shape of the survival  
251 curve according to the pathogen attributes. Skillful invaders exhibit a survival curve that drops  
252 rapidly into the exponential phase. Lethal pathogens are characterized by a survival curve that  
253 sharply declines once the pathogen reaches carrying capacity, suggesting that the host mortality  
254 rate is greater in the late stages of the infection. These results contribute to demonstrate that *C.*  
255 *elegans* is an excellent model system for unravelling simple quantitative laws in biology, as  
256 already recently proved in other fields such as aging [13] and eco-evolutionary dynamics [14].  
257

258 Disentangling virulence into its causal attributes is necessary to understand the ecology and  
259 evolution of host-pathogen systems. Historically, it has been proposed that virulence attributes  
260 are controlled by evolutionary trade-offs [15]. Plant-pathogen systems provide the longest-  
261 standing example that pathogens excel at a certain attribute in spite of others (e.g. [16]), an effect  
262 that results from co-evolution [17]. Indeed, hosts can cope with pathogens by diminishing their  
263 invasiveness (host resistance) or by decreasing their lethality (host tolerance) [18]. Such trade-  
264 offs have been observed in plants [17] and animals [19], and theoretical studies have  
265 demonstrated that they constrain the evolutionary [20] and ecological [21] fate of the host-  
266 pathogen system. However, there was no obvious trade-off between lethality and invasiveness  
267 among our three pathogens (**Fig. 4B**, **Fig. S3-left**). Host resistance ( $K^{-1}$ ) and tolerance ( $K \delta^{-1}$ ),  
268 defined as in [19], shows that hosts are more resistant to *Sm* and *Pa*, but they have higher  
269 tolerance for *Se* (**Fig. S3-right**). These two indicators, however, do not account for how fast the  
270 pathogen invades, which is also important for host survival and for the epidemiology of a  
271 disease, especially in light of recent findings where pathogen strategies in human disease are  
272 disentangled [22].  
273

274 A key observation in this study is that survival curves enter an exponential death phase, namely,  
275 the hosts eventually experience a constant mortality rate. Although to our knowledge this is the

276 first report in an experimental host-pathogen system, exponential laws are already well-  
277 established in many other areas of biology. It is textbook knowledge that microbes die  
278 exponentially after stress or prolonged starvation [23], even though density-dependent deviations  
279 have been observed [24], which can be due to cell memory effects [25]. The most frequent  
280 example of exponential statistics is perhaps found in the logistic growth of microorganisms,  
281 where the exponential face is usually preceded by a lag phase [23]. Interestingly, the expression  
282 that relates the lag time is remarkably similar to our equation (3) [26], which highlights a parallel  
283 between microorganismal growth and host decay [27]. In this respect, our pathogen lethality  $\delta$   
284 plays the analog of the bacterial growth rate, which has recently shown to be one of the few key  
285 fundamental parameters determining the state of the cell [28].

286  
287 We found that *C. elegans* reaches an exponential phase after exposure to three well-studied  
288 pathogens, although when the hosts are exposed to non-pathogenic bacteria such as  
289 *Pseudomonas chlororaphis* we find that there is no exponential phase (**Fig. S2**). Indeed, even  
290 after ten days of feeding on *P. chlororaphis* the host mortality rate had not yet stabilized. In  
291 contrast, the bacterial load saturates after 3 days, remains stable for the successive three days,  
292 then starts growing again. This effect might be due to the fact that the bacterial carrying capacity  
293 increases as the worm ages [29]. Further work will be required to clarify whether our framework  
294 has a more general applicability. With recent technological advances [30], it might be possible to  
295 adopt automatized protocols that would allow to repeat our investigations with higher-  
296 throughput.

297  
298 Finally, our investigations have been limited to single pathogens in sterile host populations, thus  
299 neglecting the interaction between the pathogen and the host microbiome. Recent works have  
300 demonstrated that *C. elegans* is a suitable model system for microbiome investigations [31][32].  
301 For example, it is known that nematodes previously colonized with certain microbes exhibit  
302 enhanced survivability during a pathogen infections [33] [34] [35]. With our framework, we can  
303 quantify how each pathogen attribute is affected as a function of the microbiome composition,  
304 thus formulating novel hypotheses for elucidating interspecies mechanics. It is our hope that  
305 simple quantitative laws of host-pathogen dynamics may provide insight into pathogenesis in  
306 more complex host-pathogen systems.

## 307 IV – MATERIALS AND METHODS

308 All chemicals were purchased from Sigma Aldrich (St. Louis, MO) if not stated otherwise.  
309

### 310 Worm and bacterial strains

311 The bacterial strains used in the paper are *Pseudomonas aeruginosa* PA14 (from Ausubel's lab,  
312 Harvard), *Serratia marcescens* Db10 (Caenorhabditis Genetics Center, CGC), *Salmonella*  
313 *enterica* LT2 (CGC), *Escherichia coli* OP50 (CGC) and *Pseudomonas chlororaphis* (ATCC  
314 9446). Throughout the work, we used *Caenorhabditis elegans* strain SS104 (*glp-4(bn2)*)  
315 obtained from CGC. Due to the *glp-4* mutation, this strain is able to reproduce at 15°C but is  
316 reproductive sterile at 25°C; use of this strain prevented the worms from producing progeny  
317 during experiments, ensuring that the only changes in worm population were due to pathogen-  
318 induced mortality.

319



## 320 Preparation of worm cultures

321 Synchronized (*i.e.* same age) worm cultures were obtained using standard protocols [36]. For  
322 propagation of worms, SS104 cultures were maintained at 15°C on NGM agar plates with lawns  
323 of the standard food organism *E. coli* OP50. For synchronization, worms from several nearly  
324 starved plates were washed with sterile distilled water and treated with a bleach-sodium  
325 hydroxide solution; the isolated eggs were placed in M9WB overnight to hatch, then transferred  
326 to NGM + OP50 plates at the sterility-inducing temperature (25°C) for 2 days to obtain  
327 synchronized adults. Worms were then washed from plates using M9 worm buffer + 0.1% Triton  
328 X-100 (Tx), then rinsed with M9 worm buffer. Worms were then transferred to S medium + 100  
329 µg/mL gentamicin + 5X heat-killed OP50 for 24 hours to kill any OP50 inhabiting the intestine,  
330 resulting in germ-free synchronized worms. These 3-day-old synchronized adult worms were  
331 then rinsed in M9PG (M9WB + 0.1% PEG; PEG is used to prevent the worms from sticking to  
332 the pipette tip), washed via sucrose flotation to remove debris, and rinsed 3X in M9PG worm  
333 buffer to remove sucrose before use in experiments.

334

## 335 Survival curves assay

336 To generate the data of Fig 1A and 1B we used a variation of a previously published protocol  
337 [9]. For a single condition (*i.e.* a survival curve on *Pa*), we run our assay in a 6-well plate where  
338 each well (4 cm diameter) represents a technical replicate. Each well is filled with 4 mL of SK  
339 agar media (recipe in [16]). To prevent worms from exiting the plate, we add 15 µL of palmitic  
340 acid (10 mg/mL in EtOH) to each well border. Pathogen monocultures are grown for 24 hr at  
341 30°C in LB, then 7 µL of culture is pipetted to the center of each plate and spread using a small  
342 metal cell spreader to create a pathogen lawn. The 6-well plate is then parafilmmed to prevent  
343 evaporation and incubated at 25°C for the desired time (Fig. 1A: 4 hr, low density; 24 hr, mid  
344 density; 48 hr, high density. Fig. 1B: 48 hr). To each well, we then add off-lawn a population of  
345 ~50 adult reproductive sterile germ-free worms suspended in M9PG, as described in the previous  
346 section. As the buffer is quickly absorbed by the plate, the worms start feeding on the pathogen  
347 lawn. We keep the 6-well plate parafilmmed and incubated at 25°C throughout the whole  
348 experiment, and we monitor the number of worm surviving using standard worm picking  
349 protocols [9].

350

## 351 Pathogen load assay

352 Our protocol is a variation of previously published protocols [29] [33] [37]. Briefly, we use two  
353 buffers: TXLV (M9WB with 1% Triton-X + 50 mM levamisole) and TXAB (TXLV +  
354 gentamicin and carbenicillin ~210 µg/mL). We prepare 6-well plates as described in the previous  
355 section. Since measurement of the pathogen load is destructive, we could not use the same worm  
356 population to measure both the pathogen load and the survival curve. Thus, we prepared a group  
357 of plates under identical conditions and separated them into two groups: we estimated the  
358 survival curve from one group and the pathogen load from the other, thus assuming that the two  
359 groups possess equal average dynamics. To measure the pathogen load, we collected each day  
360 >30 alive worms and washed them four times in TXLV. Due to levamisole, worm peristalsis is  
361 interrupted and the mouth and anus of the worm remains shut, thus preventing the internal  
362 bacteria to be flushed out. We then resuspended the worm population in TXAB and incubated for  
363 1 hr at 25 °C with gentle shaking. Every 20 mins, we washed and resuspended the population in  
364 fresh TXAB. The purpose of the incubation is to remove the external bacteria attached to the  
365 worm cuticle. We then washed the worms 3-4 times in TXLV to remove the antibiotic and

366 transfer the population to a small Petri dish. Using a dissecting scope, we removed the worms  
 367 that were not fully paralyzed. We then split the worm population into three Kontes tubes so that  
 368 each tube contains 50  $\mu$ L TXLV and 10 worms. Each tube constitutes a technical replicate. We  
 369 homogenize the worms in a tube with a pellet pestle for 1 min continuously. We then dilute the  
 370 solution in M9WB, and plate to LB agar plates for colony counting. Pathogen load is reported as  
 371 the mean +/- sem of the three technical replicates.

372

### 373 Statistical analysis

374 Details of our statistical analysis are provided as a supplementary *R* notebook.

375

### 376 Figure 1

377 Markers in Fig. 1-A and 1-B represent mean survival curve averaged across 6 technical  
 378 replicates. Corresponding *LT50*s were determined graphically from mean survival curve. Solid  
 379 lines in Fig. 1-A and 1-B were obtained by fitting the mean survival curve using a linear model.

380

381 In Fig. 1-C, we reported lethalties of different pathogens, estimated for different initial densities.  
 382 The corresponding survival curves are shown in Fig. 1-A and Fig. S1. To estimate lethalties, we  
 383 determined the fitting region from the mean survival curve, then fitted each technical replicate  
 384 using a linear model. Next, we computed average lethality and their standard errors obtaining the  
 385 values in the tables below. These values are consistent with those in *Supplementary Table 1*,  
 386 which were obtained with a non-linear fit, as described later.

387

|                                                 | <b><i>Pa</i> (high)</b> | <b><i>Pa</i> (mid)</b> | <b><i>Pa</i> (low)</b> |
|-------------------------------------------------|-------------------------|------------------------|------------------------|
| average lethality $\delta$ ( $\text{hr}^{-1}$ ) | 0.057                   | 0.053                  | 0.052                  |
| standard error ( $\text{hr}^{-1}$ )             | 0.009                   | 0.003                  | 0.006                  |

388

|                                                 | <b><i>Sm</i> (high)</b> | <b><i>Sm</i> (mid)</b> | <b><i>Sm</i> (low)</b> |
|-------------------------------------------------|-------------------------|------------------------|------------------------|
| average lethality $\delta$ ( $\text{hr}^{-1}$ ) | 0.034                   | 0.031                  | 0.028                  |
| standard error ( $\text{hr}^{-1}$ )             | 0.005                   | 0.004                  | 0.004                  |

389

|                                                 | <b><i>Se</i> (high)</b> | <b><i>Se</i> (mid)</b> | <b><i>Se</i> (low)</b> |
|-------------------------------------------------|-------------------------|------------------------|------------------------|
| average lethality $\delta$ ( $\text{hr}^{-1}$ ) | 0.035                   | 0.031                  | 0.034                  |
| standard error ( $\text{hr}^{-1}$ )             | 0.005                   | 0.003                  | 0.005                  |

390

391

392 In Fig. 1-B we repeated the experiment with a single incubation time but using 12 technical  
 393 replicates for each pathogen. We estimated lethalties following same procedure described  
 394 above. We find the following values:

395

|                                                | <i>Pa</i> | <i>Sm</i> | <sup>396</sup> <i>Se</i> |
|------------------------------------------------|-----------|-----------|--------------------------|
| average lethality $\delta$ (hr <sup>-1</sup> ) | 0.058     | 0.022     | 0.033                    |
| standard error (hr <sup>-1</sup> )             | 0.004     | 0.002     | 0.006                    |

397

398 Figure 4-C / Supplementary Table 1

399 Markers correspond to mean pathogen loads averaged over 3-4 technical replicates obtained for  
400 different initial pathogen densities. Pathogen loads are rescaled by the carrying capacity  $K_{Pa} =$   
401  $2.8 \cdot 10^5$  cells, which we determined by inspection. The mean pathogen loads are fitted using the  
402 solution of equation (1) (see *Supplementary Material: Theoretical Model*). To carry out the  
403 fitting procedure, we imposed the same growth rate  $r$  for the three conditions, but different  
404 colonization rates:  $c_{\text{high}}$ ,  $c_{\text{mid}}$  and  $c_{\text{low}}$ . For each condition, we computed the sum-of-square  
405 error between the solution of equation (1) and the mean pathogen load data. We estimated the  
406 four parameters  $r$ ,  $c_{Pa,48}$ ,  $c_{Pa,24}$  and  $c_{Pa,4}$  by minimizing the sum of the errors for the three fits.  
407 To provide errors for the fitted parameters, we bootstrapped the pathogen loads data and repeated  
408 the fitting procedure, hence obtaining different values for  $r$ ,  $c_{Pa,48}$ ,  $c_{Pa,24}$  and  $c_{Pa,4}$ . We repeated  
409 the fit 500 times and computed the standard deviations of the four parameters, which represent  
410 our errors on the fitted data. Values and errors are shown in the *Supplementary Table 1*.

411

412 Figure 3 / Supplementary Table 2

413 Figure 1-B show mean pathogen load data averaged over 3-4 technical replicates for each  
414 pathogen. These curves are used to determine (by inspection) the carrying capacities (see  
415 *Supplementary Table 2*). We then fit the model solutions of equations (1) and (2) (explicit  
416 formulae in *Supplementary Material: Theoretical Model*) to the normalized pathogen load data  
417 and the corresponding survival curves in Fig. 1-B. Our fitting procedure is similar to that in  
418 Figure 4-C. We estimated the parameters  $r$ ,  $c$ , and  $\delta$  for the three pathogens by minimizing the  
419 sum of the square-errors for the pathogen load and the growth curve. Errors to these parameters  
420 are given by bootstrapping. Values and errors are shown in the *Supplementary Table 2*.

421

422

423

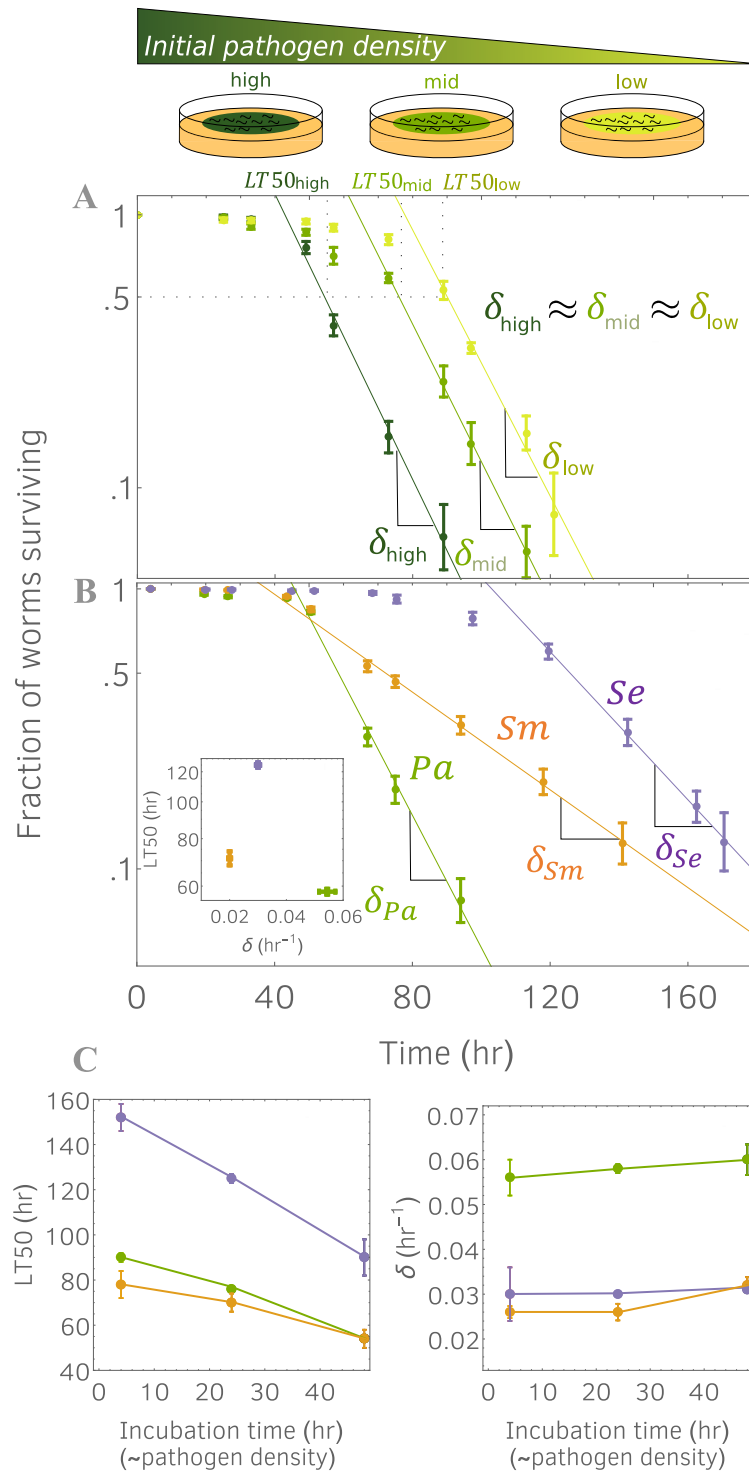

**Figure 1: Host survival curves enter an exponential death phase (visualized as a line in semi-log scale), whose slope  $\delta$  is characteristic of pathogen lethality. (A):** Survival curves obtained by exposing a population of *C. elegans* nematodes to population *P. aeruginosa*. Shade of green corresponds to different initial pathogen densities (high, mid and low), obtained by pre-incubating the pathogen lawn for different times prior to adding the hosts. Markers correspond to experimental data averaged across six technical replicates. Error bars correspond to standard errors. Survival curves enter an exponential phase with a slope independent of the initial pathogen densities. **(B):** Survival curves obtained for bacteria *P. aeruginosa* (*Pa*), *S. marcescens* (*Sm*) and *S. enterica* (*Se*). For each pathogen, we report an exponential phase with a characteristic lethality. **(B-inset):**  $LT50$  does not correlate with the lethality  $\delta$ . **(C):**  $LT50$ s (left) and  $\delta$ s (right) of different pathogens (colors matched Fig. 1B and Fig. S1), are plotted against the incubation time of the pathogen lawn. Unlike  $LT50$ , the lethality  $\delta$  does not change with the initial pathogen density.

424  
 425  
 426

Fraction of worms surviving  $w$

$$\underbrace{\frac{\dot{w}}{w}}_{\text{worm per capita death rate}} = - \underbrace{\delta \frac{N}{K}}_{\text{pathogen killing rate}}$$

Normalized pathogen abundance  $\frac{N}{K}$

pathogen grows and colonizes      saturates at carrying capacity

$$\dot{N} = (rN + c) \left(1 - \frac{N}{K}\right)$$

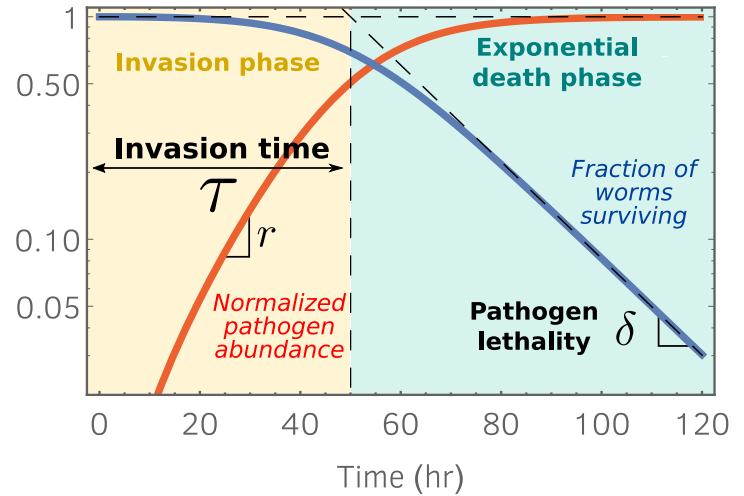

427  
428  
429

43 **Figure 2: A theoretical model predicts that the survival curves enters the exponential phase as the pathogen abundance inside the hosts (*i.e.* pathogen load) reaches carrying capacity.** Our model formulates predictions for the survival curve  $w$  and the pathogen load  $N$ , starting from the pathogen growth rate inside the host  $r$ , the pathogen colonization rate  $c$ , the pathogen lethality  $\delta$ , and the pathogen carrying capacity  $K$ . We use the initial conditions  $N(0) = 0$  and  $w(0) = 1$ . The right panel shows the fraction of worms surviving (solid blue line) and the per capita pathogen load normalized by the carrying capacity,  $N/K$  (solid red line). The model disentangles the invasion phase, in which the worm mortality rate increases over time, from the exponential phase, where host mortality occurs with constant (maximum) rate  $\delta$ . The time taken to enter the exponential phase  $\tau$  is given by the intersection between the exponential phase asymptote (diagonal dashed line) and  $w = 1$  (horizontal dashed line).

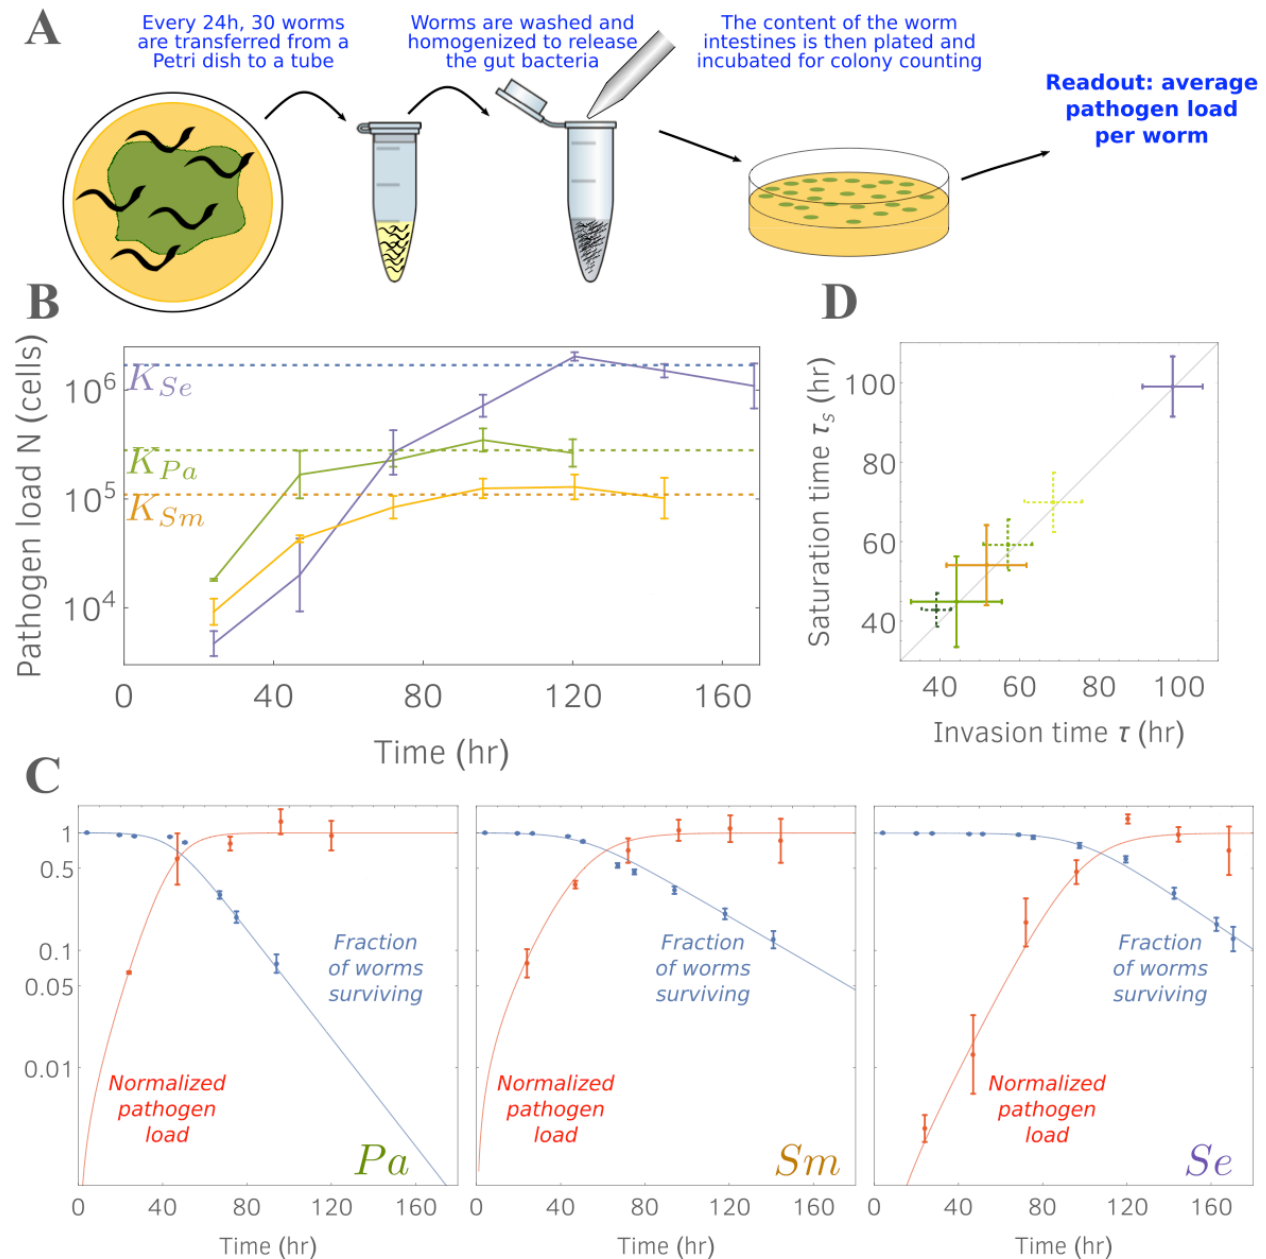

431

**Figures 3: Experiments confirm that hosts enter the exponential death phase at the same time that the pathogens saturate within the host. (A):** Illustration of the protocol used to measure the pathogen load within the hosts. **(B):** Per worm pathogen growth curves. Pathogen abundances data are obtained by averaging 3 or 4 replicates, each replicate consisting of a population of 10 worms. Error bars denote standard errors; dashed lines correspond to estimated pathogen carrying capacities. **(C):** Pathogen abundance data normalized by their carrying capacity (red markers) are plotted against the survival curve data (blue markers) of Fig. 1-B. Data are fitted by our model predictions (solid red and blue curves; parameter values in *Supplementary Table 2*; see *Material and Methods* section for fitting procedure). **(D):** As predicted by our model, the time taken by the pathogen population to saturate within the hosts is equal to the time necessary for the hosts to enter the exponential death phase (invasion time defined in Fig. 2). Solid lines: saturation and invasion times estimated from data in Fig. 1B and 3B. Dashed lines: times estimated from data in Fig. 1A and 4C.

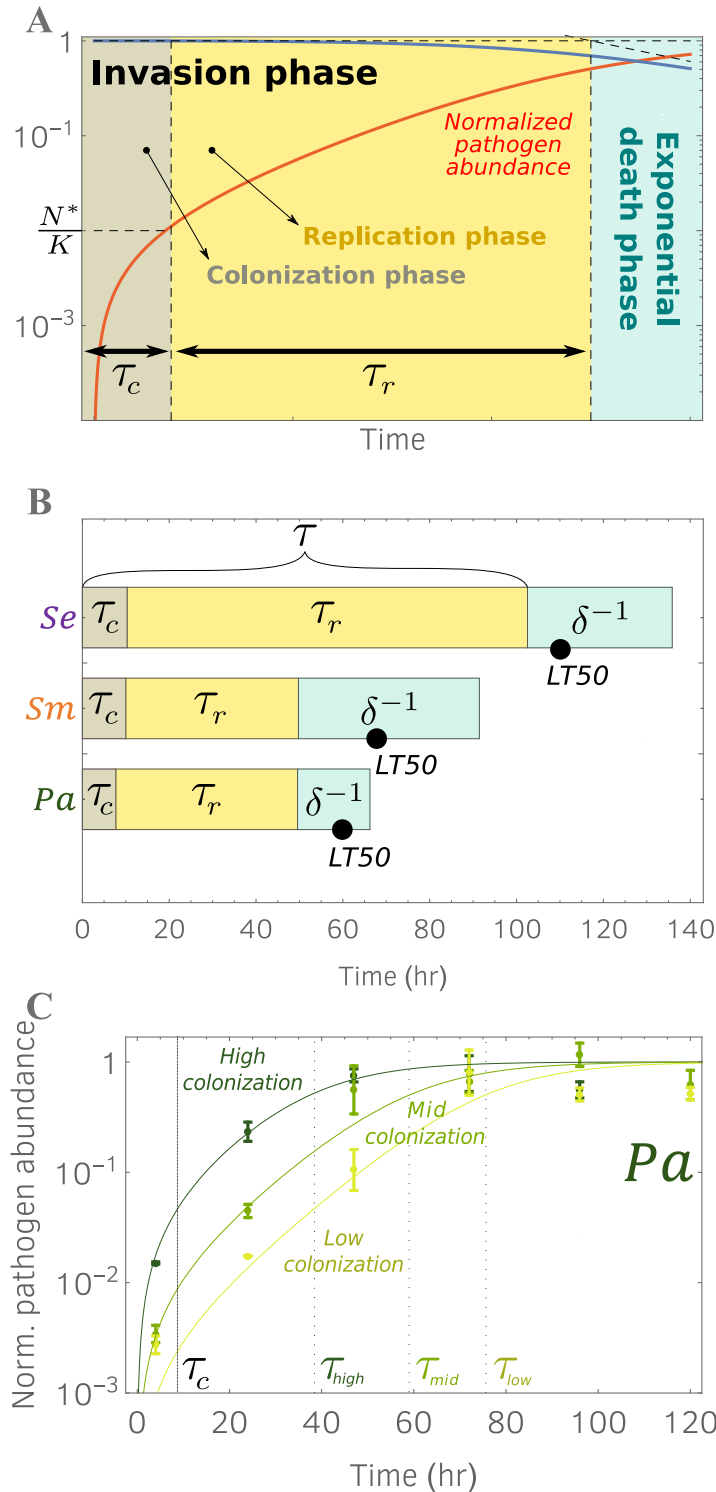

**Figure 4: Invasion phase can be further disentangled into a colonization phase and a replication phase. (A):** Invasion phase (see Fig. 2) is initially dominated by colonization for a time  $\tau_c = r^{-1} \ln 2$ . As the pathogen load reaches  $N^* = c/r$ , replication is the leading effect for the remaining time  $\tau_r$ . The difference between colonization phase and replication phase results in a slope change in the normalized pathogen abundance (solid red line). **(B):** Timescales for the three pathogens (parameters values in *Supplementary Table 2*). **(C):** *Pa* growth curves corresponding to survival curves shown in Fig. 1-A. Solid lines are model predictions for normalized pathogen abundances, obtained for same parameter values but different colonization rates (*Supplementary Table 1*). Invasion times for different colonization rates are shown.

434 **BIBLIOGRAPHY**

435

436 1. Casadevall A, Pirofski L. Host-Pathogen Interactions: Redefining the Basic Concepts of  
437 Virulence and Pathogenicity. *Infect Immun.* 1999;67: 3703–3713.

438 2. Casadevall A, Pirofski L. Host-Pathogen Interactions: The Attributes of Virulence. *J Infect*  
439 *Dis.* 2001;184: 337–344. doi:10.1086/322044

440 3. Abrol DP, editor. *Integrated Pest Management: Current Concepts and Ecological*  
441 *Perspective.* 1 edition. Amsterdam ; Boston: Academic Press; 2013.

442 4. *Comprehensive Toxicology - 3rd Edition* [Internet]. [cited 11 May 2018]. Available:  
443 <https://www.elsevier.com/books/comprehensive-toxicology/mcqueen/978-0-08-100601-6>

444 5. Mahajan-Miklos S, Tan M-W, Rahme LG, Ausubel FM. Molecular mechanisms of bacterial  
445 virulence elucidated using a *Pseudomonas aeruginosa*–*Caenorhabditis elegans* pathogenesis  
446 model. *Cell.* 1999;96: 47–56.

447 6. Tan M-W, Rahme LG, Sternberg JA, Tompkins RG, Ausubel FM. *Pseudomonas aeruginosa*  
448 killing of *Caenorhabditis elegans* used to identify *P. aeruginosa* virulence factors. *Proc Natl*  
449 *Acad Sci U S A.* 1999;96: 2408–2413.

450 7. Kim DH, Feinbaum R, Alloing G, Emerson FE, Garsin DA, Inoue H, et al. A Conserved p38  
451 MAP Kinase Pathway in *Caenorhabditis elegans* Innate Immunity. *Science.* 2002;297: 623–  
452 626. doi:10.1126/science.1073759

453 8. Zhang Y, Lu H, Bargmann CI. Pathogenic bacteria induce aversive olfactory learning in  
454 *Caenorhabditis elegans*. *Nature.* 2005;438: 179–184. doi:10.1038/nature04216

455 9. Kirienko NV, Cezairliyan BO, Ausubel FM, Powell JR. *Pseudomonas aeruginosa* PA14  
456 Pathogenesis in *Caenorhabditis elegans*. In: Filloux A, Ramos J-L, editors. *Pseudomonas*  
457 *Methods and Protocols.* New York, NY: Springer New York; 2014. pp. 653–669. Available:  
458 [http://link.springer.com/10.1007/978-1-4939-0473-0\\_50](http://link.springer.com/10.1007/978-1-4939-0473-0_50)

459 10. Clark LC, Hodgkin J. Commensals, probiotics and pathogens in the *Caenorhabditis elegans*  
460 model. *Cell Microbiol.* 2014;16: 27–38. doi:10.1111/cmi.12234

461 11. Gog JR, Pellis L, Wood JLN, McLean AR, Arinaminpathy N, Lloyd-Smith JO. Seven  
462 challenges in modeling pathogen dynamics within-host and across scales. *Epidemics.*  
463 2015;10: 45–48. doi:10.1016/j.epidem.2014.09.009

464 12. Cook A. Electrophysiological recordings from the pharynx. *WormBook.* 2006;  
465 doi:10.1895/wormbook.1.110.1

466 13. Stroustrup N, Anthony WE, Nash ZM, Gowda V, Gomez A, López-Moyado IF, et al. The  
467 temporal scaling of *Caenorhabditis elegans* ageing. *Nature.* 2016;530: 103–107.  
468 doi:10.1038/nature16550



- 469 14. Thutupalli S, Uppaluri S, Constable GWA, Levin SA, Stone HA, Tarnita CE, et al. Farming  
470 and public goods production in *Caenorhabditis elegans* populations. Proc Natl Acad Sci.  
471 2017;114: 2289–2294. doi:10.1073/pnas.1608961114
- 472 15. Anderson RM, May RM. Coevolution of hosts and parasites. Parasitology. 1982;85: 411–  
473 426. doi:10.1017/S0031182000055360
- 474 16. Meyer Susan E., Stewart Thomas E., Clement Suzette. The quick and the deadly: growth vs  
475 virulence in a seed bank pathogen. New Phytol. 2010;187: 209–216. doi:10.1111/j.1469-  
476 8137.2010.03255.x
- 477 17. Fineblum WL, Rausher MD. Tradeoff between resistance and tolerance to herbivore damage  
478 in a morning glory. Nature. 1995;377: 517–520. doi:10.1038/377517a0
- 479 18. Medzhitov R, Schneider DS, Soares MP. Disease Tolerance as a Defense Strategy. Science.  
480 2012;335: 936–941. doi:10.1126/science.1214935
- 481 19. Råberg L, Sim D, Read AF. Disentangling Genetic Variation for Resistance and Tolerance to  
482 Infectious Diseases in Animals. Science. 2007;318: 812–814. doi:10.1126/science.1148526
- 483 20. Roy BA, Kirchner JW. Evolutionary dynamics of pathogen resistance and tolerance.  
484 Evolution. 2000;54: 51–63. doi:10.1554/0014-3820(2000)054[0051:EDOPRA]2.0.CO;2
- 485 21. Sansonetti PJ. To be or not to be a pathogen: that is the mucosally relevant question.  
486 Mucosal Immunol. 2011;4: 8–14. doi:10.1038/mi.2010.77
- 487 22. Regoes RR, McLaren PJ, Battegay M, Bernasconi E, Calmy A, Günthard HF, et al.  
488 Disentangling Human Tolerance and Resistance Against HIV. Schneider DS, editor. PLoS  
489 Biol. 2014;12: e1001951. doi:10.1371/journal.pbio.1001951
- 490 23. Madigan MT, Bender KS, Buckley DH, Sattley WM, Stahl DA. Brock Biology of  
491 Microorganisms. 15 edition. NY, NY: Pearson; 2017.
- 492 24. Phaiboun A, Zhang Y, Park B, Kim M. Survival Kinetics of Starving Bacteria Is Biphasic  
493 and Density-Dependent. PLOS Comput Biol. 2015;11: e1004198.  
494 doi:10.1371/journal.pcbi.1004198
- 495 25. Mathis R, Ackermann M. Response of single bacterial cells to stress gives rise to complex  
496 history dependence at the population level. Proc Natl Acad Sci. 2016;113: 4224–4229.  
497 doi:10.1073/pnas.1511509113
- 498 26. Manhart M, Adkar BV, Shakhnovich EI. Trade-offs between microbial growth phases lead to  
499 frequency-dependent and non-transitive selection. Proc R Soc B Biol Sci. 2018;285:  
500 20172459. doi:10.1098/rspb.2017.2459
- 501 27. Wang Z, Goldenfeld N. Fixed points and limit cycles in the population dynamics of  
502 lysogenic viruses and their hosts. Phys Rev E. 2010;82: 011918.  
503 doi:10.1103/PhysRevE.82.011918

- 504 28. Scott M, Gunderson CW, Mateescu EM, Zhang Z, Hwa T. Interdependence of Cell Growth  
505 and Gene Expression: Origins and Consequences. *Science*. 2010;330: 1099–1102.  
506 doi:10.1126/science.1192588
- 507 29. Portal-Celhay C, Bradley ER, Blaser MJ. Control of intestinal bacterial proliferation in  
508 regulation of lifespan in *Caenorhabditis elegans*. *BMC Microbiol*. 2012;12: 49.  
509 doi:10.1186/1471-2180-12-49
- 510 30. Lee KS, Lee LE, Levine E. HandKChip - Hands-free killing assay on a chip. *Sci Rep*.  
511 2016;6. doi:10.1038/srep35862
- 512 31. Zhang F, Berg M, Dierking K, Félix M-A, Shapira M, Samuel BS, et al. *Caenorhabditis*  
513 *elegans* as a Model for Microbiome Research. *Front Microbiol*. 2017;8.  
514 doi:10.3389/fmicb.2017.00485
- 515 32. Vega NM, Gore J. Stochastic assembly produces heterogeneous communities in the  
516 *Caenorhabditis elegans* intestine. *PLOS Biol*. 2017;15: e2000633.  
517 doi:10.1371/journal.pbio.2000633
- 518 33. Portal-Celhay C, Blaser MJ. Competition and Resilience between Founder and Introduced  
519 Bacteria in the *Caenorhabditis elegans* Gut. *Infect Immun*. 2012;80: 1288–1299.  
520 doi:10.1128/IAI.05522-11
- 521 34. King KC, Brockhurst MA, Vasieva O, Paterson S, Betts A, Ford SA, et al. Rapid evolution  
522 of microbe-mediated protection against pathogens in a worm host. *ISME J*. 2016;10: 1915–  
523 1924. doi:10.1038/ismej.2015.259
- 524 35. Montalvo-Katz S, Huang H, Appel MD, Berg M, Shapira M. Association with Soil Bacteria  
525 Enhances p38-Dependent Infection Resistance in *Caenorhabditis elegans*. *Infect Immun*.  
526 2013;81: 514–520. doi:10.1128/IAI.00653-12
- 527 36. Stiernagle T. Maintenance of *C. elegans*. *WormBook*. 2006; doi:10.1895/wormbook.1.101.1
- 528 37. Alegado RA, Campbell MC, Chen WC, Slutz SS, Tan M-W. Characterization of mediators  
529 of microbial virulence and innate immunity using the *Caenorhabditis elegans* host–pathogen  
530 model. *Cell Microbiol*. 2003;5: 435–444. doi:10.1046/j.1462-5822.2003.00287.x
- 531
